# Supplementary material for: Cytokinetic bridge triggers de novo lumen formation in vivo
Source: PubMed Central journal article supplement (PMC7062744; doi:10.1038/s41467-020-15002-8), 2020-03-09
Supplement: 41467_2020_15002_MOESM1_ESM.pdf [file 41467_2020_15002_MOESM1_ESM.pdf]

Supplementary Information for

**Cytokinetic bridge triggers *de novo* lumen formation *in vivo***

Rathbun LI<sup>1</sup>, Colicino EG<sup>1,2,6</sup>, Manikas J<sup>1</sup>, O'Connell J<sup>1</sup>, Krishnan N<sup>1</sup>, Reilly NS<sup>3</sup>, Coyne S<sup>2,4</sup>, , Erdemci-Tandogan G<sup>5</sup>, Garrastegui A<sup>1</sup>, Freshour J<sup>1</sup>, Santra P<sup>2</sup>, Manning ML<sup>5</sup>, Amack JD<sup>2</sup>, Hehnly H<sup>\*1</sup>

<sup>1</sup>Biology Department, Syracuse University, Syracuse NY

<sup>2</sup>Department of Cell and Developmental Biology, SUNY Upstate Medical School, Syracuse NY

<sup>3</sup>Department of Physics and Astronomy, University of Rochester, Rochester NY

<sup>4</sup>Department of Biology, SUNY Geneseo, Geneseo NY

<sup>5</sup>Department of Physics, Syracuse University, Syracuse NY

<sup>6</sup>Current location: Department of Cell and Developmental Biology, University of Michigan Medical School Ann Arbor, MI

\*Corresponding author: [hhehnly@syr.edu](mailto:hhehnly@syr.edu)

**This PDF file includes:**

Supplementary Figures 1-6

Supplementary Tables 1-5

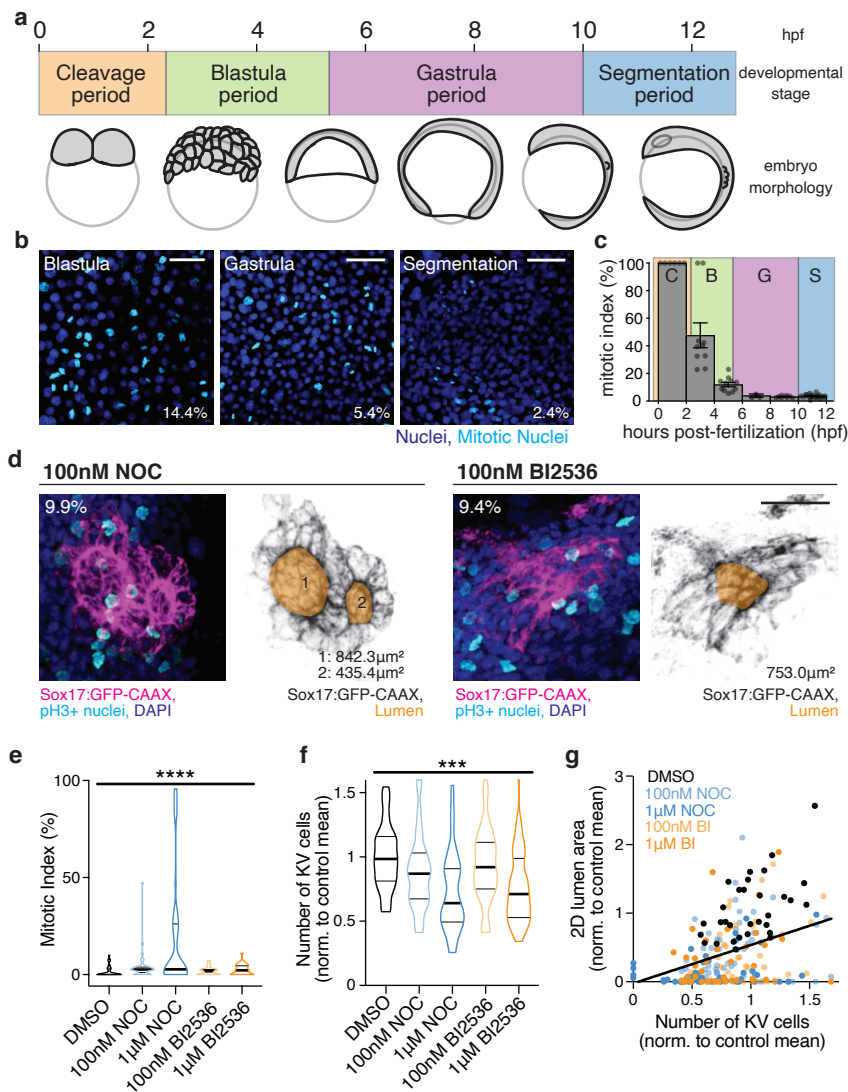

**Supplementary Figure 1. Mitosis is required for lumen formation.** (a) Timeline depicting zebrafish embryo development from 0-12 hours post-fertilization (hpf, top) and models with embryo morphology during these stages (bottom). Adapted from 19. (b) Representative confocal projection of nuclei during the blastula, gastrula, and segmentation periods. Mitotic nuclei (cyan) and non-dividing nuclei (blue) displayed. Percentages indicate mitotic index of image. Bar, 20 $\mu\text{m}$ . (c) Histogram displaying mitotic index from 0-12hpf. Cleavage (C, orange), blastula (B, green), gastrula (G, purple), and segmentation (S, blue) periods highlighted.  $n > 80$  embryos  $\pm$  SEM.  $N=6$  (0-2hpf), 10 (2-4hpf), 11 (4-6hpf), 3 (6-8hpf), 9 (8-10hpf), 32 embryos (10-12hpf) from 11 clutches. (d) Representative 3D renderings of KV under conditions of microtubule inhibition (100nM nocodazole) or PLK1 inhibition (100nM BI2536). Sox17:GFP-CAAX (magenta), pH3-positive nuclei (cyan), and DAPI (blue) shown on left. Sox17:GFP-CAAX (gray) and lumen trace (orange) shown on right. Bar, 20 $\mu\text{m}$ . Percentages indicate mitotic index of image. (e-f) Violin plot depicting KV mitotic index (e) or cell number (f) under conditions of DMSO (black), BI2536 (orange), or nocodazole (blue) treatment. Endpoints depict minimum and maximum values, quartiles depicted by thin black lines, median depicted by thick black line. (e-f) One-way ANOVA,  $p < 0.00001$  (\*\*\*\*). (e) DMSO:  $n=27$  embryos, 100nM BI2536:  $n=35$  embryos, 1 $\mu\text{M}$  BI2536:  $n=30$  embryos, 100nM nocodazole:  $n=39$  embryos, 1 $\mu\text{M}$  nocodazole:  $n=40$  embryos per treatment over four independent experiments.  $F(4,166)=8.733$ ,  $df=166$ . (f) DMSO:  $n=32$  embryos, 100nM BI2536:  $n=40$  embryos, 1 $\mu\text{M}$  BI2536:  $n=37$  embryos, 100nM nocodazole:  $n=48$  embryos, 1 $\mu\text{M}$  nocodazole:  $n=45$  embryos per treatment over four independent experiments.  $F(4,197)=6.137$ ,  $df=197$ . (g) Scatter plot depicting relationship between number cells in KV (normalized to control mean, x-axis) and 2D lumen area (normalized to control mean, y-axis). DMSO (black), BI2536 (orange), and nocodazole (blue) treatment conditions included.  $n > 31$  embryos per treatment across five independent experiments. Pearson's correlation:  $r=0.3653$ ,  $p < 0.0001$  (\*\*\*\*),  $n=206$  pairs of x,y values.

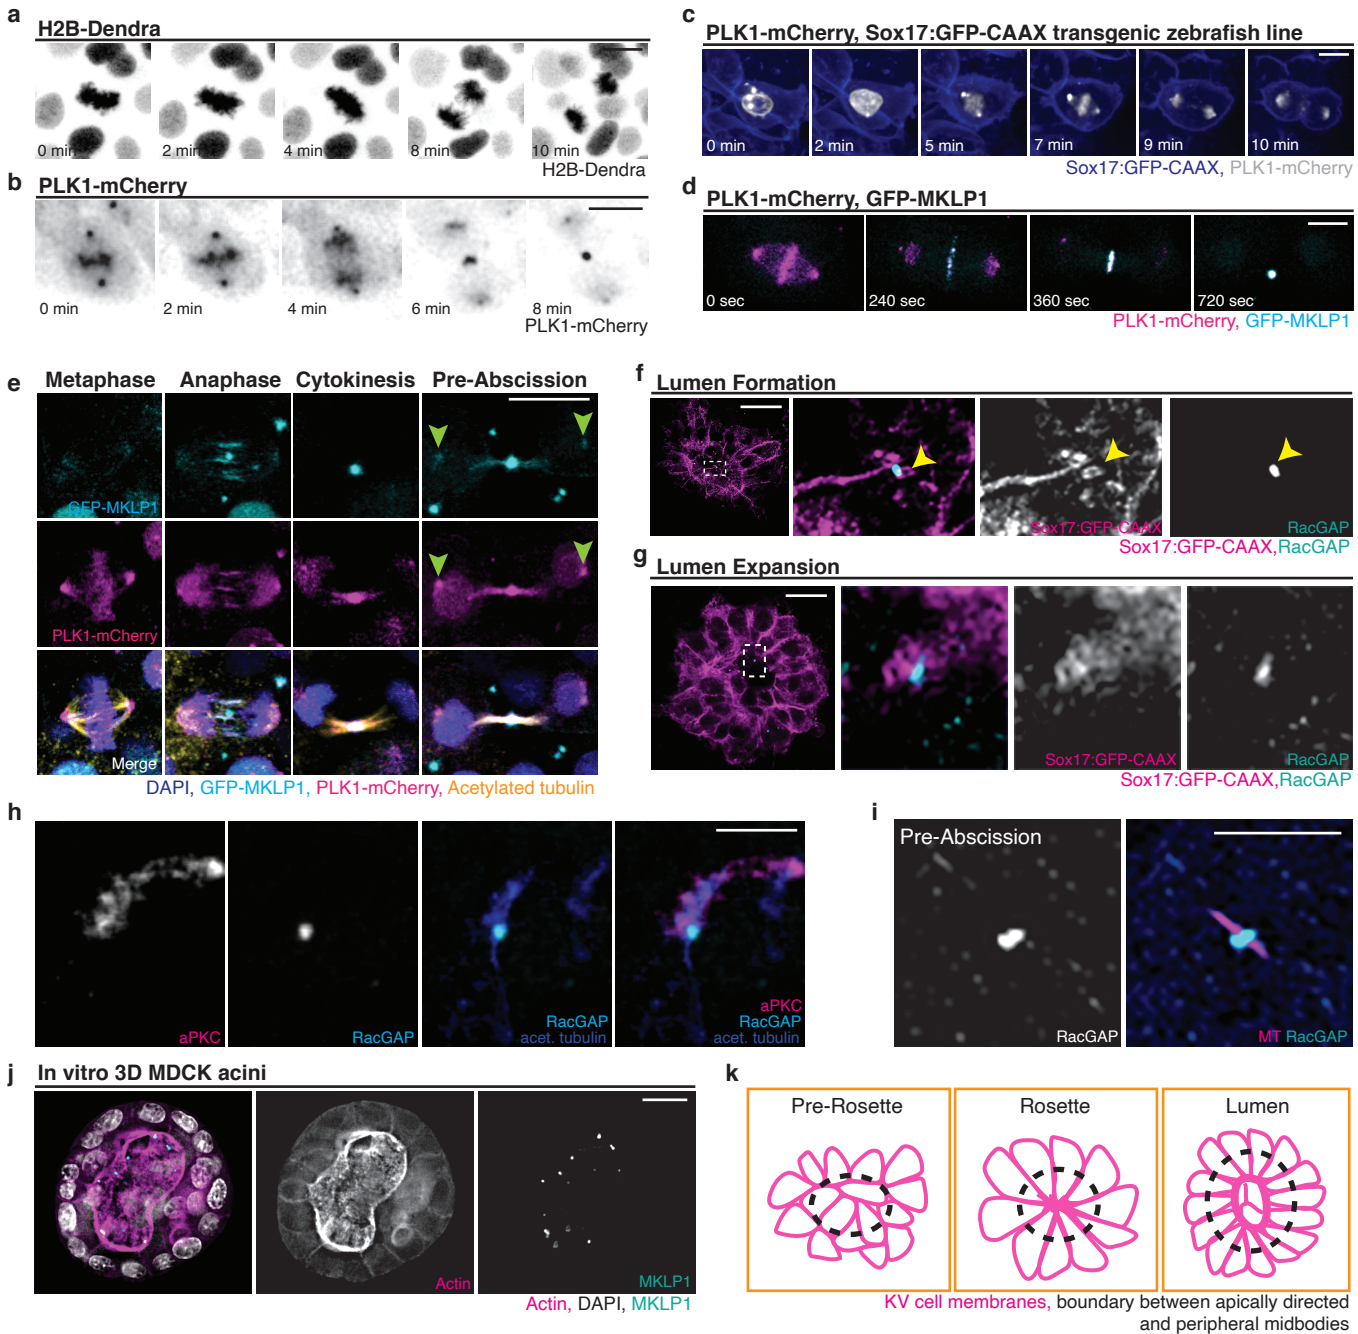

**Supplementary Figure 2. Cytokinetic midbodies localize to apical membranes of lumens *in vitro* and *in vivo*.**

(a-b) Maximum confocal projections of live cell divisions shown by nuclear marker (H2B-Dendra, a) and mitotic marker (mCherry-PLK1, b). Bars, 10 $\mu$ m. (c) 3D rendering of a live Sox17:GFP-CAAX-positive cell (blue) expressing PLK1-mCherry (white) as it progresses through mitosis. Bar, 10  $\mu$ m. (d) Maximum confocal projections of a live mitotic cell as it progresses from metaphase (0 sec) to cytokinesis (720 sec). PLK1-mCherry (magenta) and GFP-MKLP1 (cyan) depicted. Bar, 5 $\mu$ m. (e) Maximum confocal projections of fixed mitotic cells during metaphase, anaphase, cytokinesis, and pre-abscission. Nuclei (blue), MKLP1 (cyan), PLK1 (magenta), and acetylated tubulin (gold) shown. Green arrowheads depict locations of centrosomes during cytokinesis. Bar, 5 $\mu$ m. (f-g) Maximum confocal projections of fixed embryos during lumen formation and lumen expansion stages of KV development. Midbodies (RacGAP, cyan) and KV membrane (CAAX, magenta) shown. Bar, 20 $\mu$ m. (h) Maximum STED microscopy projections of fixed embryos depicting the cytokinetic midbody (RacGAP, cyan), apical polarity (aPKC, magenta), and acetylated tubulin (blue). Bar, 5 $\mu$ m. (i) Maximum projection depicting a midbody (RacGAP, cyan) and associated cytokinetic bridge (tubulin, magenta). Bar, 10 $\mu$ m. (j) MDCK 3D-acini immunolabeled for actin (magenta), midbodies (MKLP1, cyan), and nuclei (DAPI, white). Bar, 20 $\mu$ m. (k) Diagram depicting the boundary between apical midbodies (inner KV) and peripheral midbodies (outer KV) shown by dashed black line. KV cell membranes (magenta) shown at pre-rosette (left), rosette (center), and lumen (right) shown.

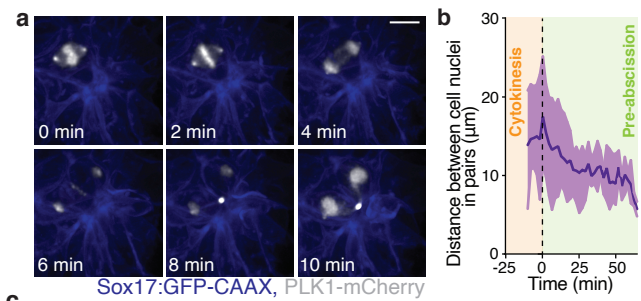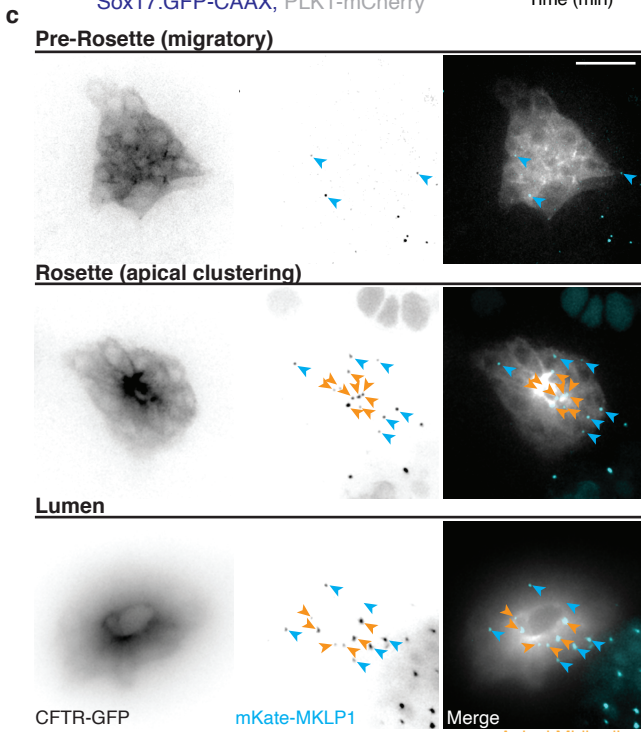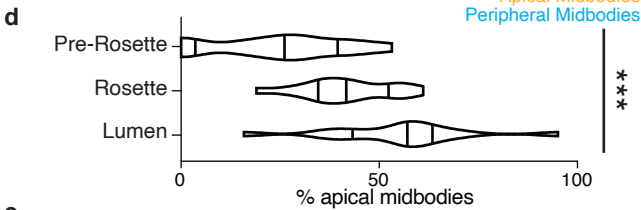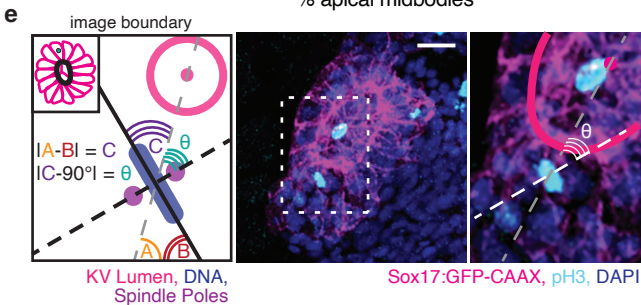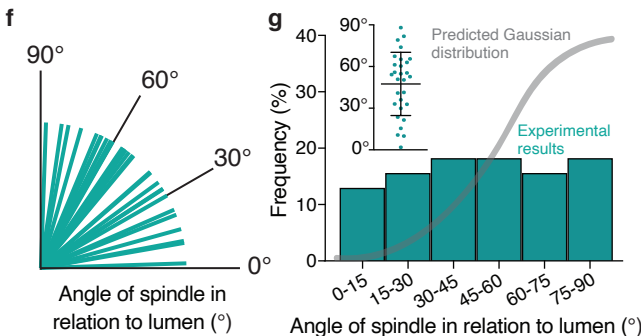

**Supplementary Figure 3. Cytokinetic bridges are placed at the site of future KV lumen formation.**

**(a)** 3D renderings of a mitotic cell (PLK1-mCherry, cyan) within KV (Sox17:GFP-CAAX, magenta) during metaphase (top) and cytokinesis (bottom). Orange asterisk denotes position of forming lumen during cytokinesis. Bar, 10µm. **(b)** Distance between cell pairs quantified from cytokinesis (-10 to 0 min) through pre-abscission (0-70 min, n = 17 pairs from n = 7 embryos, range with mean shown). **(c)** Representative images of midbody localization (mKate-MKLP1, cyan) within KV (CFTR-GFP, grayscale). Pre-rosette (top), rosette (middle), and lumen (bottom) stages of KV development depicted. Orange arrowheads denote apical midbodies, cyan arrowheads denote peripheral midbodies. Bar, 20µm. **(d)** Violin plot depicting percentage of apical midbodies in live KVs at pre-rosette (n=12 embryos), rosette (n=15 embryos), and lumen (n=15 embryos) stages. Endpoints depict minimum and maximum values, quartiles depicted by thin black lines, median depicted by thick black line. n>4 independent experiments. One-way ANOVA, p<0.0001 (\*\*\*\*), F(2,39)=12.74, df=39. **(e)** Diagram for spindle orientation calculations (left). Angle calculation example within KV (right). Bar, 20 µm. **(f-g)** Individual spindle angles (f) and angle frequency (g, n = 28 cells, n = 25 embryos) for mitotic cells during KV development. Inset, scatterplot of individual angles ± SD.

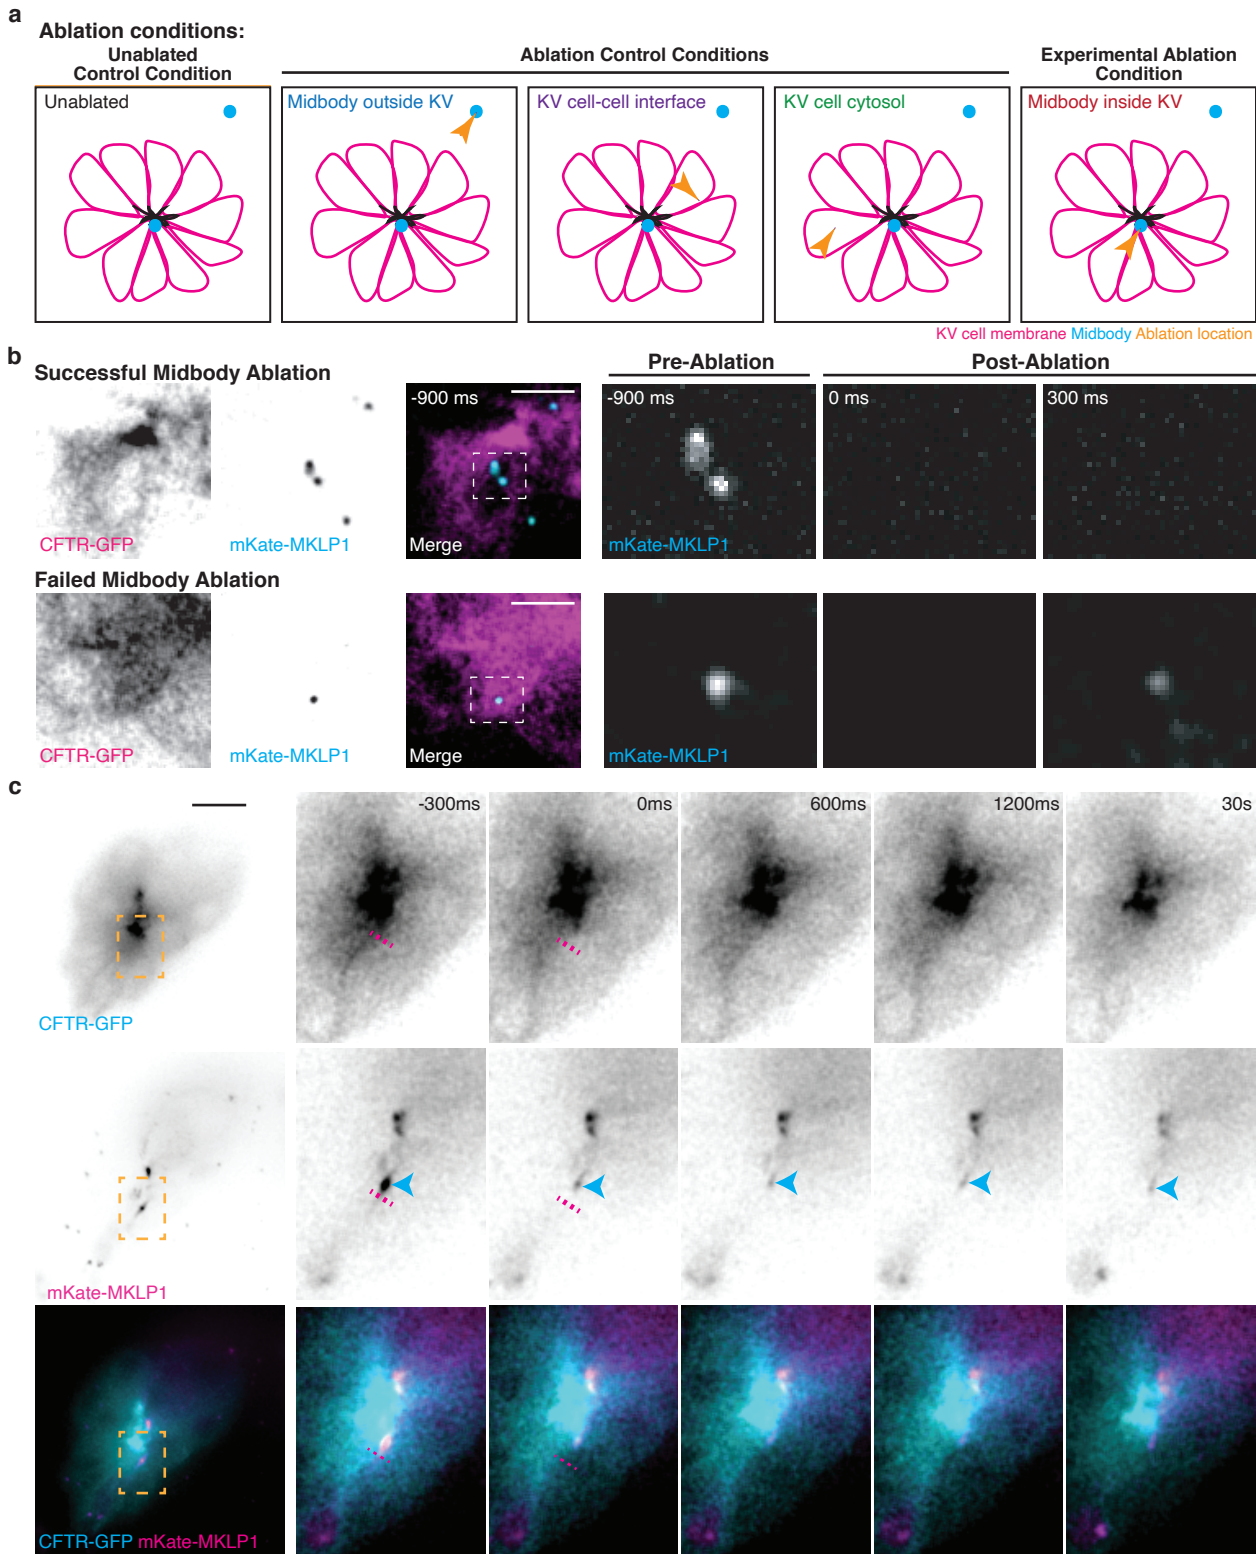

**Supplementary Figure 4. Premature cleavage of the cytokinetic bridge via laser ablation results in disrupted lumen formation.** (a) Diagram depicting locations of laser ablation for unablated embryos and embryos with ablation of midbody outside KV (blue), KV cell-cell interface (purple), KV cell cytosol (green), or midbody inside KV (red). KV cell membrane (magenta), midbody marker (cyan), and ablation location (orange arrowhead) shown. (b) Maximum projections depicting a successful (top) and failed (bottom) midbody ablation. KV marker (CFTR-GFP, magenta) and midbodies (mKate-MKLP1, cyan) shown. Pre-ablation and post-ablation images shown on right of panels (mKate-MKLP1, grayscale). Bar, 10 $\mu$ m. (c) Time lapse images depicting a single cytokinetic bridge (mKate-MKLP1 magenta) within KV (CFTR-GFP, cyan). Inset shows cytokinetic bridge magnified at 3x. Cyan arrowhead depicts midbody with ablation location shown with magenta dashed line. Bar, 20 $\mu$ m.

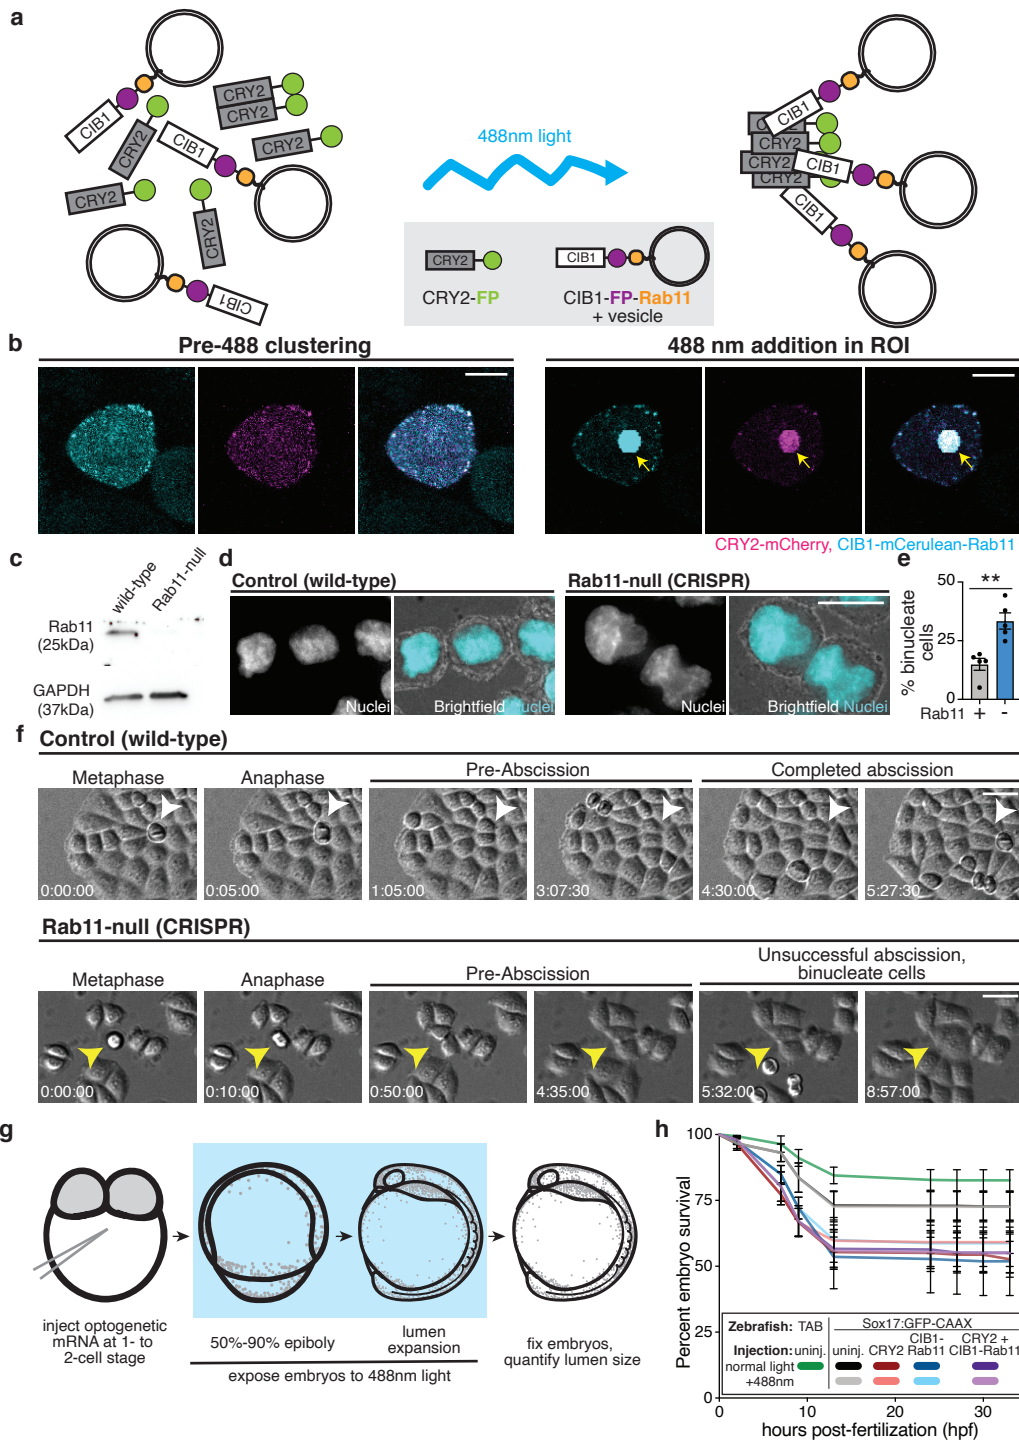

**Supplementary Figure 5. Optogenetic clustering of Rab11-associated vesicles results in failed abscission *in vitro* and *in vivo*.**

**(a)** Model depicting CRY2/CIB1 optogenetic system utilized in these studies. Since multiple fluorescent molecules are used, FP (fluorescent protein) is used in model for simplicity. CRY2-FP and CIB1-FP-Rab11 shown under conditions of no light (no clustering) or 488nm light (clustering). **(b)** Example micrograph of HeLa cells before (left) and after (right) exposure to 488nm light within a circular ROI. CRY2-mCherry (magenta) and CIB1-mCerulean-Rab11 (cyan) shown. Bar, 5 $\mu$ m. **(c)** Western blot depicting Rab11 protein expression in wild-type (left) and Rab11-null CRISPR HeLa cells (right). Rab11 (25kDa) and GAPDH (37kDa) loading control shown. **(d)** Representative maximum projections of nuclei in wild-type (left) and Rab11-null CRISPR cells (right). Brightfield (grayscale) and nuclei (DAPI, cyan) shown. Bar, 10 $\mu$ m. **(e)** Bar graph depicting percentage of binucleate cells in wild-type (Rab11-positive, gray) and Rab11-null CRISPR cells (Rab11-negative, cyan). Two-tailed Mann-Whitney  $p=0.0079$  (\*\*),  $u=0$ .  $n=100$  cells across  $n=5$  experiments. **(f)** Time lapse images of cell divisions in wild-type (control, top) and Rab11-null CRISPR cells (bottom). Metaphase, anaphase, pre-absission stages shown with either subsequent completed (white arrowhead) or unsuccessful abscission with binucleate cell resulting (yellow arrowhead). Bar, 50 $\mu$ m. **(g)** Model depicting optogenetic experiment protocol. **(h)** Line graph depicting embryo survival during the first 33hpf. Wild-type (TAB) embryos (green,  $n=655$  embryos from 3 clutches), uninjected transgenic embryos +/- 488nm light exposure (grayscale,  $n=831$  embryos from 4 clutches), CRY2-FP-injected transgenic embryos +/- 488nm light exposure (red), CIB1-FP-Rab11-injected transgenic embryos +/- 488nm light exposure (blue), and CRY2-FP + CIB1-FP-Rab11-injected transgenic embryos +/- 488nm light exposure (purple,  $n=555$  embryos from 4 clutches) shown. Mean  $\pm$  SEM shown.

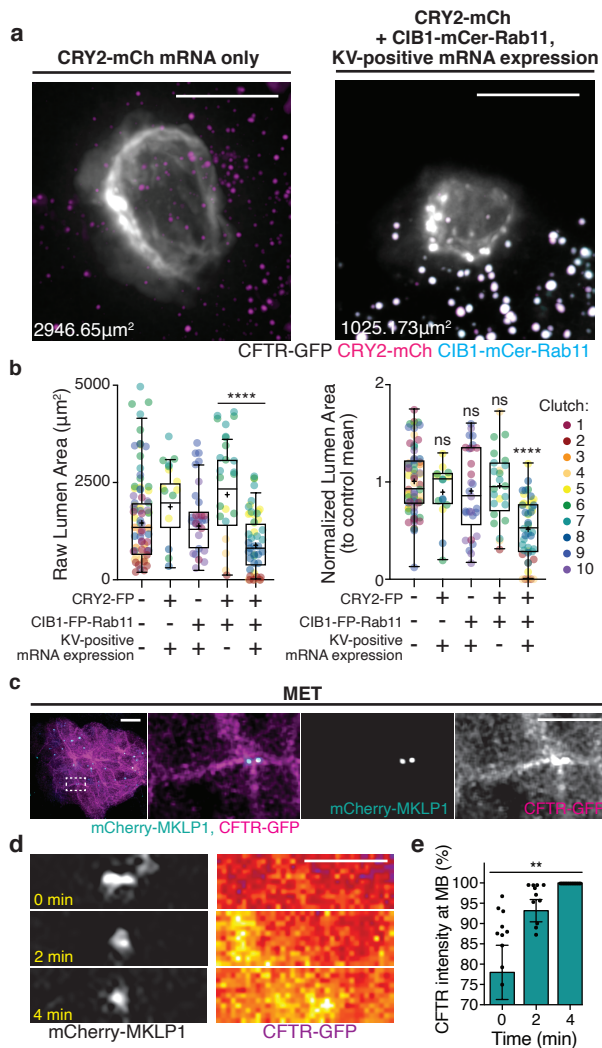

**Supplementary Figure 6. Optogenetic clustering of Rab11 during KV development results in abnormal lumen formation and perturbed polarity establishment.** (a) Representative 3D renderings of KV under conditions of CRY2-mCherry mRNA only, or CRY2-mCherry + CIB1-mCerulean-Rab11 with KV-positive mRNA expression. KV cells (CFTR-GFP, white), CRY2-mCherry (magenta), and CIB1-mCerulean-Rab11 (cyan) shown. Bars, 50 μm. (b) Box and whisker plots comparing raw (left) and normalized (right) lumen area resulting from optogenetic experiments (Figure 6b). Normalized data shown as a ratio compared to uninjected control mean. Whiskers denote minimum and maximum values, 25th and 75th percentiles denoted by box boundaries. Median denoted by line within box, mean denoted by plus sign. Data from 10 individual clutches shown by colors described in legend. n>15 embryos per treatment. Results from unpaired, two-tailed Student's t-test of raw data set (left) and one-way ANOVA with Dunnett's multiple comparison test in normalized data described in detail in Supplementary Table 5. (c) Midbodies (mCherry-MKLP1, cyan) localize at sites of apical polarity (CFTR-GFP, magenta) during MET stage of KV development. Bar, 20 μm (top), 10 μm (bottom). (d) Apical polarity (monitored by CFTR, Fire LUT) increases within a 4 minute time frame adjacent to the cytokinetic midbody (mCherry-MKLP1). Bar, 5 μm. (e) Quantification of CFTR-GFP intensity over time. n = 12 midbodies ± SEM, n = 4 embryos, One-way ANOVA, p = 0.0023 (\*\*), F(2,33) = 7.323, df=33.

## Supplementary Tables

### Supplementary Table 1: Key Resources Table

| Reagent Type (species or resource) | Designation                                                                                                           | Source                                                                                                                                                                                                                                                                                                                                                   |
|------------------------------------|-----------------------------------------------------------------------------------------------------------------------|----------------------------------------------------------------------------------------------------------------------------------------------------------------------------------------------------------------------------------------------------------------------------------------------------------------------------------------------------------|
| General Genes Examined (zebrafish) | Mitotic kinesin-like protein (MKLP1), Histone H2B (H2B)                                                               | Gene ID #: MKLP1- 30627<br>H2B- 100334869, 100334559, 100329560, 100329290                                                                                                                                                                                                                                                                               |
| Organ of Asymmetry localized genes | cystic fibrosis transmembrane conductance regulator (CFTR)                                                            | Gene ID #:<br>CFTR- 559080                                                                                                                                                                                                                                                                                                                               |
| Commercial Assay/Kit               | NEBuilder HiFi DNA Assembly Cloning Kit (NEB no E5520S), mMESSAGE mMACHINE™ SP6 transcription kit (Invitrogen AM1340) | - <a href="https://www.neb.com/products/e5520-nebuilder-hifi-dna-assembly-cloning-kit#Product%20Information">https://www.neb.com/products/e5520-nebuilder-hifi-dna-assembly-cloning-kit#Product%20Information</a><br>- <a href="https://www.thermofisher.com/order/catalog/product/AM1340">https://www.thermofisher.com/order/catalog/product/AM1340</a> |
| Software/Algorithm                 | ImageJ/FIJI, Bitplane IMARIS                                                                                          | Bitplane                                                                                                                                                                                                                                                                                                                                                 |
| Drugs                              | BI2536, nocodazole                                                                                                    | BI2536 (Selleck Chemicals S1109), nocodazole (ACROS Organics 358240500)                                                                                                                                                                                                                                                                                  |

### Supplementary Table 2: Antibodies

| Name                                   | Dilution | Company/Cat. No                   |
|----------------------------------------|----------|-----------------------------------|
| Anti-GFP                               | 1:200    | Abcam                             |
| phospho-Histone 3 (ser10)              | 1:200    | Cell Signaling (9701S)            |
| MKLP1 (N-19)                           | 1:200    | Santa Cruz (sc-867)               |
| aPKC (zeta)                            | 1:200    | Santa Cruz (sc-216)               |
| RacGAP                                 | 1:200    | Abcam (ab2270)                    |
| $\alpha$ -tubulin conjugated with FITC | 1:200    | Sigma Aldrich (F2168)             |
| PLK1                                   | 1:200    | Cell Signaling Technology (4513S) |
| Acetylated tubulin                     | 1:200    | Sigma-Aldrich (45-T6793-100UL)    |
| ZO-1                                   | 1:200    | Invitrogen (484333A)              |
| Rab11                                  | 1:500    | Cell Signaling Technology (3539S) |
| GAPDH-HRP                              | 1:40000  | Sigma-Aldrich (45-G9295-25UL)     |

### Supplementary Table 3: Plasmid Constructs

| Construct  | Backbone | Tag                | Injection Type | Concentration [pg] |
|------------|----------|--------------------|----------------|--------------------|
| H2B        | pCS2     | Dendra             | mRNA           | 95                 |
| MKLP1      | pCS2     | GFP/mKate/ mCherry | Plasmid        | 15                 |
| MKLP1      | pCS2     | mKate/ mCherry     | mRNA           | 300                |
| CRY2       | pCS2     | mCherry/untagged   | mRNA           | 100                |
| CIB1-Rab11 | pCS2     | mCerulean/mCherry  | mRNA           | 100                |
| PLK1       | pCS2     | mCherry            | mRNA           | 100                |

### Supplementary Table 4: Zebrafish Transgenic Lines

| Type       | Name                                       | Source                                         |
|------------|--------------------------------------------|------------------------------------------------|
| Wild-Type  | TAB                                        | Zebrafish International Resource Center (ZIRC) |
| Transgenic | <i>Tg(sox17:GFP-CAAX)<sup>сны101</sup></i> | Dasgupta et al., 2018                          |
| Transgenic | <i>Tg(sox17:GFP)</i>                       | Sakaguchi et al., 2006                         |
| Transgenic | <i>Tg(sox17:dsRED)</i>                     | Chung et al., 2008                             |
| Transgenic | <i>TgBAC(cftr-GFP)</i>                     | Navis et al., 2013                             |



**Supplementary Table 5. Detailed statistical analysis results**

| Figure                       | Category                                | n   | Statistical test                                 | Parameters                 | Result  | p-value |
|------------------------------|-----------------------------------------|-----|--------------------------------------------------|----------------------------|---------|---------|
| 1c                           | migratory                               | 10  | Unpaired Student's t-test (two-tailed)           | t=5.444, df=18             | ****    | <0.0001 |
|                              | MET                                     | 9   |                                                  | t=2.930, df=16             | **      | 0.0098  |
|                              | AC                                      | 8   |                                                  | t=3.766, df=14             | **      | 0.002   |
|                              | LF                                      | 9   |                                                  | t=3.992, df=16             | **      | 0.001   |
|                              | LE                                      | 7   |                                                  | t=3.345, df=12             | **      | 0.0058  |
| 1e                           | DMSO                                    | 41  | One-way ANOVA with Dunnett's multiple comparison | df=241<br>F(4,241)=25.86   | control | n/a     |
|                              | 100nM NOC                               | 50  |                                                  |                            | ****    | <0.0001 |
|                              | 1uM NOC                                 | 43  |                                                  |                            | ****    | <0.0001 |
|                              | 100nM BI                                | 58  |                                                  |                            | ****    | <0.0001 |
|                              | 1uM BI                                  | 54  |                                                  |                            | ****    | <0.0001 |
| Supp1e                       | DMSO                                    | 27  | One-way ANOVA with Dunnett's multiple comparison | df=166<br>F(4,166) = 8.733 | ****    | <0.0001 |
|                              | 100nM NOC                               | 35  |                                                  |                            |         |         |
|                              | 1uM NOC                                 | 30  |                                                  |                            |         |         |
|                              | 100nM BI                                | 39  |                                                  |                            |         |         |
|                              | 1uM BI                                  | 40  |                                                  |                            |         |         |
| Supp1f                       | DMSO                                    | 32  | One-way ANOVA with Dunnett's multiple comparison | df=197<br>F(4,197) = 6.137 | ***     | 0.0001  |
|                              | 100nM NOC                               | 40  |                                                  |                            |         |         |
|                              | 1uM NOC                                 | 37  |                                                  |                            |         |         |
|                              | 100nM BI                                | 48  |                                                  |                            |         |         |
| Supp1g                       | lumen area vs. cell number              | 206 | Pearson's correlation                            | r=0.3653                   | ****    | <0.0001 |
|                              |                                         |     |                                                  |                            |         |         |
| 2e                           | pre-rosette                             | 21  | One-Way ANOVA                                    | df=69,<br>F(2,69) = 104.7  | ****    | <0.0001 |
|                              | rosette                                 | 16  |                                                  |                            |         |         |
|                              | lumen                                   | 35  |                                                  |                            |         |         |
| Supp3d                       | pre-rosette                             | 12  | One-Way ANOVA                                    | df=39,<br>F(2,39) = 12.74  | ****    | <0.0001 |
|                              | rosette                                 | 15  |                                                  |                            |         |         |
|                              | lumen                                   | 15  |                                                  |                            |         |         |
| 4f                           | MB outside KV                           | 7   | One-way ANOVA with Dunnett's multiple comparison | df=25<br>F(3,25)=4.352     | control | n/a     |
|                              | KV cell cytosol                         | 9   |                                                  |                            | ns      | 0.7495  |
|                              | KV cell-cell interface                  | 6   |                                                  |                            | ns      | 0.9955  |
|                              | MB inside KV                            | 7   |                                                  |                            | **      | 0.0097  |
| 5c                           | CRY2 + CIB1-mCherry-Rab11               | 6   | Mann-Whitney test (two-tailed)                   | U = 0                      | **      | 0.0043  |
|                              | CRY2 + CIB1-mCherry-Rab11 + 488nm light | 5   |                                                  |                            |         |         |
| 5f                           | uninjected                              | 5   | One-way ANOVA with Dunnett's multiple comparison | df=32<br>F(5,32)=41.51     | control | control |
|                              | uninjected + 488nm light                | 6   |                                                  |                            | ns      | 0.9982  |
|                              | CIB1-mCh-Rab11                          | 5   |                                                  |                            | ns      | 0.9795  |
|                              | CIB1-mCh-Rab11 + 488nm light            | 9   |                                                  |                            | ns      | >0.9999 |
|                              | CRY2 + CIB1-mCh-Rab11                   | 7   |                                                  |                            | ns      | 0.9628  |
|                              | CRY2 + CIB1-mCh-Rab11 + 488nm light     | 6   |                                                  |                            | ****    | <0.0001 |
| Supp5e                       | Control vs Rab11 CRISPR                 | 5   | Mann-Whitney test (two-tailed)                   | U = 0                      | **      | 0.0079  |
| 6b/Supp6b early              | uninjected                              | 73  | One-way ANOVA with Dunnett's multiple comparison | df=183<br>F(4,183)=15.43   | control | n/a     |
|                              | CRY2 only                               | 15  |                                                  |                            | ns      | 0.8467  |
|                              | CIB1 only                               | 29  |                                                  |                            | ns      | 0.7293  |
|                              | CRY2+CIB1, no KV                        | 24  |                                                  |                            | ns      | 0.9946  |
|                              | CRY2+CIB1, +KV                          | 47  |                                                  |                            | ****    | <0.0001 |
| late                         | uninjected                              | 11  | One-way ANOVA with Dunnett's multiple comparison | df=83<br>F(2,83)=58.28     | control | n/a     |
|                              | CIB1 only                               | 8   |                                                  |                            | ns      | 0.6908  |
|                              | CRY2+CIB1, +KV                          | 18  |                                                  |                            | ****    | <0.0001 |
| Supp6b (non-normalized data) | uninjected                              | 73  | Unpaired Student's t-test (two-tailed)           | t=6.315, df=69             | n/a     | n/a     |
|                              | CRY2 only                               | 15  |                                                  |                            | n/a     | n/a     |
|                              | CIB1 only                               | 29  |                                                  |                            | n/a     | n/a     |
|                              | CRY2+CIB1, no KV                        | 24  |                                                  |                            | ****    | <0.0001 |
|                              | CRY2+CIB1, +KV                          | 47  |                                                  |                            |         |         |
| 6d                           | CIB1-mCh-Rab11                          | 15  | One-way ANOVA with Dunnett's multiple comparison | df=70<br>F(3,70)=39.97     | control | control |
|                              | CIB1-mCh-Rab11 + 488nm light            | 16  |                                                  |                            | ns      | 0.6562  |
|                              | CRY2 + CIB1-mCh-Rab11                   | 19  |                                                  |                            | ns      | 0.975   |
|                              | CRY2 + CIB1-mCh-Rab11 + 488nm light     | 24  |                                                  |                            | ****    | <0.0001 |
| 6e (CFTR-positive)           | CIB1-mCh-Rab11                          | 10  | One-way ANOVA with Dunnett's multiple comparison | df=54<br>F(3,54)=21.83     | control | control |
|                              | CIB1-mCh-Rab11 + 488nm light            | 13  |                                                  |                            | ns      | 0.7845  |
|                              | CRY2 + CIB1-mCh-Rab11                   | 13  |                                                  |                            | ns      | >0.9999 |
|                              | CRY2 + CIB1-mCh-Rab11 + 488nm light     | 22  |                                                  |                            | ****    | <0.0001 |
| 6e (CIB1-positive)           | CIB1-mCh-Rab11                          | 10  | One-way ANOVA with Dunnett's multiple comparison | df=54<br>F(3,54)=23.21     | control | control |
|                              | CIB1-mCh-Rab11 + 488nm light            | 13  |                                                  |                            | ns      | 0.9744  |
|                              | CRY2 + CIB1-mCh-Rab11                   | 13  |                                                  |                            | ns      | 0.8978  |
|                              | CRY2 + CIB1-mCh-Rab11 + 488nm light     | 22  |                                                  |                            | ****    | <0.0001 |
| 6e (CFTR + CIB1-positive)    | CIB1-mCh-Rab11                          | 10  | One-way ANOVA with Dunnett's multiple comparison | df=54<br>F(3,54)=85.73     | control | control |
|                              | CIB1-mCh-Rab11 + 488nm light            | 13  |                                                  |                            | ns      | 0.5408  |
|                              | CRY2 + CIB1-mCh-Rab11                   | 13  |                                                  |                            | ns      | 0.9366  |
|                              | CRY2 + CIB1-mCh-Rab11 + 488nm light     | 22  |                                                  |                            | ****    | <0.0001 |
